# Supplementary material
Source: PubMed Central journal article supplement (PMC3553832)
Supplement: JB.01962-12_zjb999092368so1.pdf [file JB.01962-12_zjb999092368so1.pdf]

**Supplemental Movie Legends and Tables for:**

McBride, MJ and Y Zhu. "Gliding motility and Por secretion system genes are widespread among members of the phylum *Bacteroidetes*"

## Supplemental Movie Legends.

Movie S1. Gliding motility of *Cellulophaga algicola* and *Maribacter* sp. HTCC2170. Cells of *C. algicola* growing on Cytophaga Agar (DSMZ medium 172) at 15°C were suspended in Cytophaga Broth, introduced into a glass tunnel slide, and incubated for 5 min. Cells on the cover slip were examined using a Photometrics CoolSNAP<sub>cf</sub><sup>2</sup> camera mounted on an Olympus BH-2 phase-contrast microscope with a heated stage at 25°C. Cells of *Maribacter* sp. HTCC2170 growing on Marine Agar at 25°C were suspended in Marine Broth, spotted on a pad of Marine Broth containing 1% agar, covered with an O<sub>2</sub> permeable membrane (Yellow Springs Instrument Co., Yellow Springs, OH) and examined as described above. In both sequences the bar indicates 10 μm, and time is indicated as minutes:seconds.

Movie S2. Gliding motility of *Croceibacter atlanticus*. Cells of *C. atlanticus* growing on Marine Agar at 25°C were suspended in Marine Broth, introduced into a glass tunnel slide, and incubated for 5 min. Cells on the cover slip were examined using a Photometrics CoolSNAP<sub>cf</sub><sup>2</sup> camera mounted on an Olympus BH-2 phase-contrast microscope with a heated stage at 25°C. The images in Fig. 4A came from this movie and correspond to the middle portion of the field. Bar indicates 10 μm, and time is indicated in seconds.

Movie S3. Gliding motility of *Robiginitalea biformata*. Cells of *R. biformata* growing on Marine Agar at 30°C were suspended in Marine Broth. In the first sequence cells

were introduced into a glass tunnel slide, incubated for 5 min, and cells on the cover slip were examined using a Photometrics CoolSNAP<sub>cf</sub><sup>2</sup> camera mounted on an Olympus BH-2 phase-contrast microscope with a heated stage at 25°C. In the second sequence cells were spotted on a pad of Marine Broth containing 1% agar, covered with an O<sub>2</sub> permeable membrane, and examined as described above. In both sequences the bar indicates 10 μm, and time is indicated as minutes:seconds. The images in Fig. 4B came from the second part of this movie and correspond to the top middle portion of the field.

Movie S4. Gliding motility of '*Gramella forsetii*'. Cells of '*G. forsetii*' growing on Marine Agar at 25°C were suspended in Cytophaga Salts, which consisted of Cytophaga Agar (DSMZ medium 172) in which yeast extract, tryptone, and agar had been omitted. Cells were spotted on a pad of Cytophaga Salts containing 1% agar, covered with an O<sub>2</sub> permeable membrane and examined using a Photometrics CoolSNAP<sub>cf</sub><sup>2</sup> camera mounted on an Olympus BH-2 phase-contrast microscope with a heated stage at 25°C. The images in Fig. 4C came from this movie and correspond to the top middle portion of the field. Bar indicates 10 μm, and time is indicated as minutes:seconds.

Movie S5. Gliding motility of *Riemerella anatipestifer*. Cells of *R. anatipestifer* growing on TS Agar at 37°C were suspended in TS Broth. In the first sequence cells were introduced into a glass tunnel slide, incubated for 5 min, and cells on the cover slip were examined using a Photometrics CoolSNAP<sub>cf</sub><sup>2</sup> camera mounted on an Olympus BH-2 phase-contrast microscope with a heated stage at 25°C. In the second sequence cells were spotted on a pad of TS containing 1% agar, covered with an O<sub>2</sub> permeable

membrane, and examined as described above. In both sequences the bar indicates 10  $\mu\text{m}$ , and time is indicated as minutes:seconds. The images in Fig. 4D came from the second part of this movie and correspond to the lower right portion of the field.

Movie S6. Gliding motility of *Paludibacter propionigenes*. Cells of *P.*

*propionigenes* were grown anaerobically on PYG Agar at 25°C. Cells were suspended in PYG Broth and examined for motility in the presence of atmospheric levels of O<sub>2</sub>. In the first sequence cells were observed in wet mount, and cells on the cover slip were examined using a Photometrics CoolSNAP<sub>cf</sub><sup>2</sup> camera mounted on an Olympus BH-2 phase-contrast microscope with a heated stage at 25°C. In the second sequence cells were spotted on a pad of PYG containing 1% agar, covered with an O<sub>2</sub> permeable membrane, and examined as described above. In both sequences the bar indicates 10  $\mu\text{m}$ , and time is indicated as minutes:seconds. The images in Fig. 4E came from the second part of this movie and correspond to the lower left portion of the field.

Table S1. Bacterial strains with completed genomes analyzed in this study<sup>a</sup>

| Bacterial strain                                          | Class                   | Reference | Source <sup>b</sup> |
|-----------------------------------------------------------|-------------------------|-----------|---------------------|
| <i>Capnocytophaga canimorsus</i> Cc5                      | <i>Flavobacteriia</i>   | (1)       |                     |
| <i>Capnocytophaga ochracea</i> DSM 7271 <sup>T</sup>      | <i>Flavobacteriia</i>   | (2)       |                     |
| <i>Cellulophaga algicola</i> DSM 14237 <sup>T</sup>       | <i>Flavobacteriia</i>   | (3)       | DSMZ                |
| <i>Cellulophaga lytica</i> DSM 7489 <sup>T</sup>          | <i>Flavobacteriia</i>   | (4)       |                     |
| <i>Croceibacter atlanticus</i> HTCC2559 <sup>T</sup>      | <i>Flavobacteriia</i>   | (5)       | ATCC                |
| <i>Flavobacteriaceae</i> bacterium 3519-10                | <i>Flavobacteriia</i>   | (6)       |                     |
| <i>Flavobacterium johnsoniae</i> ATCC 17061 <sup>T</sup>  | <i>Flavobacteriia</i>   | (7)       |                     |
| <i>Flavobacterium psychrophilum</i> JIP02/86              | <i>Flavobacteriia</i>   | (8)       |                     |
| ' <i>Gramella forsetii</i> ' KT0803                       | <i>Flavobacteriia</i>   | (9)       | Bernhard Fuchs      |
| <i>Maribacter</i> sp. HTCC2170                            | <i>Flavobacteriia</i>   | (10)      | Jang-Cheon Cho      |
| <i>Riemerella anatipestifer</i> DSM 15868 <sup>T</sup>    | <i>Flavobacteriia</i>   | (11)      | DSMZ                |
| <i>Robiginitalea biformata</i> HTCC2501 <sup>T</sup>      | <i>Flavobacteriia</i>   | (12)      | ATCC                |
| <i>Weeksella virosa</i> DSM 16922 <sup>T</sup>            | <i>Flavobacteriia</i>   | (13)      | DSMZ                |
| <i>Zunongwangia profunda</i> SM-A87 <sup>T</sup>          | <i>Flavobacteriia</i>   | (14)      | DSMZ                |
|                                                           |                         |           |                     |
| <i>Cytophaga hutchinsonii</i> ATCC 33406 <sup>T</sup>     | <i>Cytophagia</i>       | (15)      |                     |
| <i>Dyadobacter fermentans</i> DSM 18053 <sup>T</sup>      | <i>Cytophagia</i>       | (16)      | ATCC                |
| <i>Leadbetterella byssophila</i> DSM 17132 <sup>T</sup>   | <i>Cytophagia</i>       | (17)      | DSMZ                |
| <i>Marivirga tractuosa</i> DSM 4126 <sup>T</sup>          | <i>Cytophagia</i>       | (18)      |                     |
| <i>Spirosoma linguale</i> DSM 74 <sup>T</sup>             | <i>Cytophagia</i>       | (19)      | Michael Marletta    |
|                                                           |                         |           |                     |
| <i>Chitinophaga pinensis</i> DSM 2588 <sup>T</sup>        | <i>Sphingobacteriia</i> | (20)      |                     |
| <i>Pedobacter heparinus</i> DSM 2366 <sup>T</sup>         | <i>Sphingobacteriia</i> | (21)      |                     |
| <i>Pedobacter saltans</i> DSM 12145 <sup>T</sup>          | <i>Sphingobacteriia</i> | (22)      |                     |
|                                                           |                         |           |                     |
| <i>Alistipes shahii</i> WAL8301 <sup>T</sup>              | <i>Bacteroidia</i>      | (23)      |                     |
| <i>Bacteroides fragilis</i> NCTC 9343 <sup>T</sup>        | <i>Bacteroidia</i>      | (24)      |                     |
| <i>Bacteroides helcogenes</i> P 36-108 <sup>T</sup>       | <i>Bacteroidia</i>      | (25)      |                     |
| <i>Bacteroides salanitronis</i> BL78 <sup>T</sup>         | <i>Bacteroidia</i>      | (26)      |                     |
| <i>Bacteroides thetaiotaomicron</i> VPI-5482 <sup>T</sup> | <i>Bacteroidia</i>      | (27)      |                     |
| <i>Bacteroides vulgatus</i> ATCC 8482 <sup>T</sup>        | <i>Bacteroidia</i>      | (28)      |                     |
| <i>Bacteroides xylanisolvens</i> XB1A <sup>T</sup>        | <i>Bacteroidia</i>      | (29)      |                     |
| <i>Odoribacter splanchnicus</i> DSM 20712 <sup>T</sup>    | <i>Bacteroidia</i>      | (30)      |                     |
| <i>Paludibacter propionigenes</i> WB4 <sup>T</sup>        | <i>Bacteroidia</i>      | (31)      | DSMZ                |
| <i>Parabacteroides distasonis</i> ATCC 8503 <sup>T</sup>  | <i>Bacteroidia</i>      | (28)      |                     |
| <i>Porphyromonas gingivalis</i> ATCC 33277 <sup>T</sup>   | <i>Bacteroidia</i>      | (32)      |                     |
| <i>Prevotella melaninogenica</i> ATCC 25845 <sup>T</sup>  | <i>Bacteroidia</i>      | (33)      |                     |
| <i>Prevotella ruminicola</i> 23                           | <i>Bacteroidia</i>      | (34)      |                     |
|                                                           |                         |           |                     |
| <i>Rhodothermus marinus</i> DSM 4252 <sup>T</sup>         | <i>Incertae sedis</i>   | (35)      |                     |
| <i>Salinibacter ruber</i> DSM 13855 <sup>T</sup>          | <i>Incertae sedis</i>   | (36)      |                     |

<sup>a</sup>Strains within each Class are listed alphabetically.

<sup>b</sup>For strains for which laboratory experiments were conducted, the sources of the strains are indicated.

1. P. Manfredi, M. Pagni, G. R. Cornelis, Complete genome sequence of the dog commensal and human pathogen *Capnocytophaga canimorsus* strain 5. *J Bacteriol* **193**, 5558 (Oct, 2011).
2. K. Mavrommatis *et al.*, Complete genome sequence of *Capnocytophaga ochracea* type strain (VPI 2845). *Stand Genomic Sci* **1**, 101 (2009).
3. B. Abt *et al.*, Complete genome sequence of *Cellulophaga algicola* type strain (IC166). *Stand Genomic Sci* **4**, 72 (2011).
4. A. Pati *et al.*, Complete genome sequence of *Cellulophaga lytica* type strain (LIM-21). *Stand Genomic Sci* **4**, 221 (Apr 29, 2011).
5. H. M. Oh, I. Kang, S. Ferreira, S. J. Giovannoni, J. C. Cho, Complete genome sequence of *Croceibacter atlanticus* HTCC2559T. *J. Bacteriol.* **192**, 4796 (2010).
6. J. A. Raymond, B. C. Christner, S. C. Schuster, A bacterial ice-binding protein from the Vostok ice core. *Extremophiles* **12**, 713 (Sep, 2008).
7. M. J. McBride *et al.*, Novel features of the polysaccharide-digesting gliding bacterium *Flavobacterium johnsoniae* as revealed by genome sequence analysis. *Appl. Environ. Microbiol.* **75**, 6864 (2009).
8. E. Duchaud *et al.*, Complete genome sequence of the fish pathogen *Flavobacterium psychrophilum*. *Nat. Biotechnol.* **25**, 763 (2007).
9. M. Bauer *et al.*, Whole genome analysis of the marine *Bacteroidetes* '*Gramella forsetii*' reveals adaptations to degradation of polymeric organic matter. *Environ. Microbiol.* **8**, 2201 (2006).
10. H. M. Oh *et al.*, Complete Genome Sequence of Strain HTCC2170, a Novel Member of the Genus *Maribacter* in the Family *Flavobacteriaceae* *J. Bacteriol.* **193**, 303 (2011).
11. K. Mavromatis *et al.*, Complete genome sequence of *Riemerella anatipestifer* type strain (ATCC 11845). *Stand Genomic Sci* **4**, 144 (Apr 29, 2011).
12. H. M. Oh *et al.*, Complete genome sequence of *Robiginitalea biformata* HTCC2501. *J. Bacteriol.* **191**, 7144 (2009).
13. E. Lang *et al.*, Complete genome sequence of *Weeksella virosa* type strain (9751). *Stand Genomic Sci* **4**, 81 (2011).
14. Q. L. Qin *et al.*, The complete genome of *Zunongwangia profunda* SM-A87 reveals its adaptation to the deep-sea environment and ecological role in sedimentary organic nitrogen degradation. *BMC Genomics* **11**, 247 (2010).
15. G. Xie *et al.*, Genome sequence of the cellulolytic gliding bacterium *Cytophaga hutchinsonii*. *Appl. Environ. Microbiol.* **73**, 3536 (2007).
16. E. Lang *et al.*, Complete genome sequence of *Dyadobacter fermentans* type strain (NS114). *Stand Genomic Sci* **1**, 133 (2009).
17. B. Abt *et al.*, Complete genome sequence of *Leadbetterella byssophila* type strain (4M15). *Stand Genomic Sci* **4**, 2 (2011).
18. I. Pagani *et al.*, Complete genome sequence of *Marivirga tractuosa* type strain (H-43). *Stand Genomic Sci* **4**, 154 (Apr 29, 2011).

19. K. Lail *et al.*, Complete genome sequence of *Spirosoma linguale* type strain (1). *Stand Genomic Sci* **2**, 176 (2010).
20. T. Glavina Del Rio *et al.*, Complete genome sequence of *Chitinophaga pinensis* type strain (UQM 2034). *Stand Genomic Sci* **2**, 87 (2010).
21. C. Han *et al.*, Complete genome sequence of *Pedobacter heparinus* type strain (HIM 762-3). *Stand Genomic Sci* **1**, 54 (2009).
22. K. Liolios *et al.*, Complete genome sequence of the gliding, heparinolytic *Pedobacter saltans* type strain (113). *Stand Genomic Sci* **5**, 30 (Oct 15, 2011).
23. Y. Song *et al.*, *Alistipes onderdonkii* sp. nov. and *Alistipes shahii* sp. nov., of human origin. *Int J Syst Evol Microbiol* **56**, 1985 (Aug, 2006).
24. A. M. Cerdeno-Tarraga *et al.*, Extensive DNA inversions in the *B. fragilis* genome control variable gene expression. *Science* **307**, 1463 (2005).
25. A. Pati *et al.*, Complete genome sequence of *Bacteroides helcogenes* type strain (P 36-108). *Stand Genomic Sci* **4**, 45 (2011).
26. S. Gronow *et al.*, Complete genome sequence of *Bacteroides salanitronis* type strain (BL78). *Stand Genomic Sci* **4**, 191 (Apr 29, 2011).
27. J. Xu *et al.*, A genomic view of the human-*Bacteroides thetaiotaomicron* symbiosis. *Science* **299**, 2074 (2003).
28. J. Xu *et al.*, Evolution of symbiotic bacteria in the distal human intestine. *PLoS Biol* **5**, e156 (Jul, 2007).
29. C. Chassard, E. Delmas, P. A. Lawson, A. Bernalier-Donadille, *Bacteroides xylanisolvens* sp. nov., a xylan-degrading bacterium isolated from human faeces. *Int J Syst Evol Microbiol* **58**, 1008 (Apr, 2008).
30. M. Goker *et al.*, Complete genome sequence of *Odoribacter splanchnicus* type strain (1651/6). *Stand Genomic Sci* **4**, 200 (Apr 29, 2011).
31. S. Gronow *et al.*, Complete genome sequence of *Paludibacter propionigenes* type strain (WB4). *Stand Genomic Sci* **4**, 36 (2011).
32. M. Naito *et al.*, Determination of the Genome Sequence of *Porphyromonas gingivalis* Strain ATCC 33277 and Genomic Comparison with Strain W83 Revealed Extensive Genome Rearrangements in *P. gingivalis*. *DNA Res.* **15**, 215 (2008).
33. H. N. Shah, D. M. Collins, *Prevotella*, a new genus to include *Bacteroides melaninogenicus* and related species formerly classified in the genus *Bacteroides*. *Int J Syst Bacteriol* **40**, 205 (Apr, 1990).
34. J. Purushe *et al.*, Comparative genome analysis of *Prevotella ruminicola* and *Prevotella bryantii*: insights into their environmental niche. *Microb Ecol* **60**, 721 (Nov, 2010).
35. M. Nolan *et al.*, Complete genome sequence of *Rhodothermus marinus* type strain (R-10). *Stand Genomic Sci* **1**, 283 (2009).
36. E. F. Mongodin *et al.*, The genome of *Salinibacter ruber*: convergence and gene exchange among hyperhalophilic bacteria and archaea. *Proc Natl Acad Sci U S A* **102**, 18147 (Dec 13, 2005).

Table S2. Distribution of *gld* and *spr* orthologs in completed *Bacteroidetes* genomes<sup>a</sup>.

Por Secretion System Genes

| Strains <sup>b</sup>                                                          | <i>gldA</i> | <i>gldB</i> | <i>gldD</i> | <i>gldF</i> | <i>gldG</i> | <i>gldH</i>       | <i>gldI</i> | <i>gldJ</i>                  | <i>gldK</i> | <i>gldL</i> | <i>gldM</i> | <i>gldN</i> | <i>sprA</i> | <i>sprE</i> | <i>sprT</i> |
|-------------------------------------------------------------------------------|-------------|-------------|-------------|-------------|-------------|-------------------|-------------|------------------------------|-------------|-------------|-------------|-------------|-------------|-------------|-------------|
| <b>Class Flavobacteriia</b>                                                   |             |             |             |             |             |                   |             |                              |             |             |             |             |             |             |             |
| <i>Capnocytophaga canimorsus</i> Cc5 (Ccan <sub>1</sub> )                     | 13070       | 17700       | 01250       | 07670       | 07660       | 01070             | 11090       | 02800/<br>02810 <sup>c</sup> | 01610       | 01620       | 01630       | 01640       | 21890       | 01790       | 09030       |
| <i>Capnocytophaga ochracea</i> DSM7271 <sup>T</sup> (Coch <sub>1</sub> )      | 1219        | 1064        | 1383        | 1946        | 1945        | 1475              | 1855        | 0756                         | 0809        | 0808        | 0807        | 0806        | 1633        | 2029        | 1748        |
| <i>Cellulophaga algicola</i> DSM 14237 <sup>T</sup> (Celal <sub>1</sub> )     |             | 2202        | 1091        |             |             | 1514              | 2755        | 0751                         | 0884        | 0883        | 0882        | 0881        | 2075        | 1548        | 2247        |
| <i>Cellulophaga lytica</i> DSM 7489 <sup>T</sup> (Celly <sub>1</sub> )        | 1982        | 2006        | 1024        | 3200        | 3201        | 1414              | 0267        | 2068                         | 0759        | 0758        | 0757        | 0756        | 1877        | 1384        | 0647        |
| <i>Croceibacter atlanticus</i> HTCC2559 <sup>T</sup> (CA2559 <sub>1</sub> )   | 07370       | 06580       | 02655       | 08366       | 08361       | 03460             | 10703       | 05475                        | 00725       | 00730       | 00735       | 00740       | 01210       | 03020       | 12253       |
| Flavobacteriaceae bacterium 3519-10 (FIC <sub>1</sub> )                       | 00573       | 01789       | 00461       | 00812       | 00811       | 02552             | 01350       | 00569                        | 00488       | 00489       | 00490       | 00491       | 00396       | 00009       | 00515       |
| <i>Flavobacterium johnsoniae</i> ATCC 17061 <sup>T</sup> (Fjoh <sub>1</sub> ) | 1516        | 1793        | 1540        | 2722        | 2721        | 0890              | 2369        | 1557                         | 1853        | 1854        | 1855        | 1856        | 1653        | 1051        | 1466        |
| <i>Flavobacterium psychrophilum</i> JIP02/86 (FP)                             | 0252        | 2069        | 1663        | 1089        | 1090        | 0024              | 1892        | 1389                         | 1973        | 1972        | 1971        | 1970        | 2121        | 2467        | 0326        |
| ' <i>Gramella forsetii</i> ' KT0803 (orf)                                     | 335         | 2752        | 3534        | 1893        | 1894        | 3202 <sup>a</sup> | 776         | 2862                         | 2978        | 2977        | 2976        | 2975        | 181         | 3234        | 383         |
| <i>Maribacter</i> sp. HTCC2170 (FB2170 <sub>1</sub> )                         |             | 17001       | 07484       |             |             | 05475             | 09536       | 17391                        | 08679       | 08684       | 08689       | 08694       | 03020       | 05655       | 16776       |
| <i>Riemerella anatipestifer</i> DSM 15868 <sup>T</sup> (Riean <sub>1</sub> )  | 1635        | 1624        | 1556        | 0098        | 0099        | 1186              |             | 0093                         | 1644        | 1645        | 1646        | 1647        | 0835        | 0909        | 0053        |
| <i>Robiginitalea biformata</i> HTCC2501 <sup>T</sup> (RB2501 <sub>1</sub> )   | 03070       | 02945       | 08085       | 13574       | 13569       | 06435             | 01715       | 09625                        | 09005       | 09010       | 09015       | 09020       | 03615       | 06585       | 02695       |
| <i>Weeksella virosa</i> DSM 16922 <sup>T</sup> (Weevi <sub>1</sub> )          | 1318        | 1288        | 1161        | 1486        | 1485        | 0886              | 1603        | 0213                         | 0551        | 0550        | 0549        | 0548        | 0823        | 1752        | 1787        |
| <i>Zunongwangia profunda</i> SM-A87 <sup>T</sup> (ZPR <sub>1</sub> )          | 3620        | 3822        | 4488        | 1833        | 1832        | 0091              | 1687        | 3927                         | 4150        | 4149        | 4148        | 4147        | 0590        | 0057        | 0935        |
| <b>Class Cytophagia</b>                                                       |             |             |             |             |             |                   |             |                              |             |             |             |             |             |             |             |
| <i>Cytophaga hutchinsonii</i> ATCC 33406 <sup>T</sup> (CHU <sub>1</sub> )     | 1545        | 3691        | 3683        | 1546        | 1547        | 0291              |             | 3494                         | 0171        | 0172        | 0173        | 0174        | 0029        | 0177        | 2709        |
| <i>Dyadobacter fermentans</i> DSM 18053 <sup>T</sup> (Dfer <sub>1</sub> )     | 4207        | 3615        | 4560        | 4470        | 3719        | 4014              |             | 3694                         | 2915        | 2916        | 2917        | 2918        | 4465        | 5028        | 4024        |
| <i>Leadbetterella byssophila</i> DSM 17132 <sup>T</sup> (Lbys <sub>1</sub> )  | 2846        | 2934        | 3234        | 0449        | 2296        | 3361              |             | 2605                         | 1724        | 1723        | 1722        | 1721        | 0610        | 1110        | 2722        |
| <i>Marivirga tractuosa</i> DSM 4126 <sup>T</sup> (Ftrac <sub>1</sub> )        | 1432        | 2496        | 1993        | 1431        | 1430        | 3344              |             | 2188                         | 2556        | 2557        | 2558        | 2559        | 3337        | 2562        | 2975        |
| <i>Spirosoma linguale</i> DSM 74 <sup>T</sup> (Slin <sub>1</sub> )            | 3471        | 5539        | 4895        | 6627        | 4905        | 5969              |             | 5515                         | 3225        | 3224        | 3223        | 3222        | 6621        | 3219        | 6454        |



|                                                                                       |       |       |                            |      |      |       |  |      |       |       |       |       |               |       |       |
|---------------------------------------------------------------------------------------|-------|-------|----------------------------|------|------|-------|--|------|-------|-------|-------|-------|---------------|-------|-------|
| <b>Class <i>Sphingobacteriia</i></b>                                                  |       |       |                            |      |      |       |  |      |       |       |       |       |               |       |       |
| <i>Chitinophaga pinensis</i> DSM 2588 <sup>T</sup> (Cpin <sub>_</sub> )               | 1163  | 0219  | 0934                       | 0231 | 0232 | 0675  |  | 1181 | 0483  | 0481  | 0480  | 0479  | 6946          | 6608  | 7095  |
| <i>Pedobacter heparinus</i> DSM 2366 <sup>T</sup> (Phep <sub>_</sub> )                | 3248  | 0409  | 4156                       | 3237 | 3236 | 0077  |  | 4062 | 0383  | 0384  | 0385  | 0386  | 3831          | 0389  | 0978  |
| <i>Pedobacter saltans</i> DSM 12145 <sup>T</sup> (Pedsa <sub>_</sub> )                | 3771  | 2500  | 3033                       | 3772 | 3773 | 3083  |  | 2910 | 2522  | 2521  | 2520  | 2519  | 3276          | 2516  | 1964  |
| <b>Class <i>Bacteroidia</i></b>                                                       |       |       |                            |      |      |       |  |      |       |       |       |       |               |       |       |
| <i>Alistipes shahii</i> WAL 8301 <sup>T</sup> (AL1 <sub>_</sub> )                     |       |       |                            |      |      |       |  |      |       |       |       |       |               |       |       |
| <i>Bacteroides fragilis</i> NCTC 9343 <sup>T</sup> (BF)                               |       | 0895  |                            |      |      | 3911  |  |      | 2489  | 2813  | 2814  |       |               |       |       |
| <i>Bacteroides helcogenes</i> P 36-108 <sup>T</sup> (Bache <sub>_</sub> )             |       |       |                            |      |      | 1151  |  |      |       |       |       |       |               |       |       |
| <i>Bacteroides salanitronis</i> DSM 18170 <sup>T</sup> (Bacsa <sub>_</sub> )          |       | 1663  |                            |      |      | 1387  |  |      |       |       |       |       |               |       |       |
| <i>Bacteroides thetaiotaomicron</i> VPI-5482 <sup>T</sup> (BT)                        |       | 4189  |                            |      |      | 3818  |  |      |       |       |       |       |               |       |       |
| <i>Bacteroides vulgatus</i> ATCC 8482 <sup>T</sup> (BVU <sub>_</sub> )                |       | 1987  |                            |      |      | 1827  |  |      |       |       |       |       |               |       |       |
| <i>Bacteroides xylanisolvens</i> XB1A <sup>T</sup> (BXY <sub>_</sub> )                | 09440 | 32960 |                            |      |      | 48690 |  |      |       |       |       |       |               |       |       |
| <i>Odoribacter splanchnicus</i> DSM 20712 <sup>T</sup> (Odoosp <sub>_</sub> )         | 2849  |       | 0203/<br>0218 <sup>c</sup> | 1042 | 1042 | 3291  |  | 2175 |       |       |       |       | 0141/<br>0142 | 0784  | 1128  |
| <i>Paludibacter propionicigenes</i> WB4 <sup>T</sup> (Palpr <sub>_</sub> )            | 1936  | 2885  | 2874                       | 3026 | 1453 | 2407  |  | 1925 | 2503  | 2504  | 2505  | 2506  | 0997          | 1699  | 2881  |
| <i>Parabacteroides distasonis</i> ATCC 8503 <sup>T</sup> (BDI <sub>_</sub> )          |       | 1780  | 1991                       |      |      | 1879  |  |      | 3324  | 3323  | 3322  | 3321  | 2659          | 3149  | 1856  |
| <i>Porphyromonas gingivalis</i> ATCC 33277 <sup>T</sup> (PGN <sub>_</sub> )           |       | 1061  |                            |      |      | 1566  |  |      | 1676  | 1675  | 1674  | 1673  | 0832          | 1877  | 0778  |
| <i>Prevotella melaninogenica</i> ATCC25845 <sup>T</sup><br>(HMPREF0659 <sub>_</sub> ) |       | A6538 |                            |      |      | A5420 |  |      | A5267 | A5268 | A5269 | A5270 | A6108         | A5453 | A5397 |
| <i>Prevotella ruminicola</i> 23 (PRU <sub>_</sub> )                                   |       | 0632  |                            |      |      | 1703  |  |      | 2175  | 2174  | 2173  | 2172  | 2040          | 1900  | 1922  |
| <b><i>Incertae sedis</i><sup>d</sup></b>                                              |       |       |                            |      |      |       |  |      |       |       |       |       |               |       |       |
| <i>Rhodothermus marinus</i> DSM 4252 <sup>T</sup> (Rmar <sub>_</sub> )                | 1770  |       |                            | 1769 | 1768 |       |  |      |       |       |       |       | 2258          | 0835  |       |
| <i>Salinibacter ruber</i> DSM 13855 <sup>T</sup> (SRU <sub>_</sub> )                  | 1251  |       |                            | 1250 | 1249 |       |  |      |       |       |       |       | 2553          | 1028  |       |

<sup>a</sup>Locus tags for orthologs (reciprocal best hits by BLASTP analysis) are listed. The invariant portion of each locus tag (such as 'Fjoh\_' for *F. johnsoniae*) is listed after the strain name, in parenthesis. Thus, *F. johnsoniae gldA* corresponds to locus tag Fjoh\_1516. All genomes were initially searched using *F. johnsoniae* protein sequences. Maximum E values were set at 1e-50 for GldA, and 1e-5 for the other proteins. In order to confirm weak hits for bacteria distantly related to *F. johnsoniae* (Class *Flavobacteriia*), genomes were also searched with protein sequences from *C. hutchinsonii* (Class *Cytophagia*), *P. heparinus* (Class *Sphingobacteriia*) and *P. gingivalis* (Class *Bacteroidia*).

<sup>b</sup>Species previously known to exhibit gliding motility are in bold.

<sup>c</sup>*C. canimorsus gldJ* and *O. splanchnicus gldD* and *sprA* have apparent frameshift mutations that split the genes. These may be sequencing errors, or may be authentic mutations.

<sup>d</sup>The phylogenetic placement of *R. marinus* and *S. ruber* is uncertain. These species may be deeply rooted members of the phylum *Bacteroidetes*, or they may be members of another phylum.

Table S3. Members of classes *Flavobacteriia*, *Cytophagia*, and *Sphingobacteriia* with incomplete (Draft) genome sequences analyzed in this study<sup>a</sup>.

| Bacterial strain                                              | Class                   |
|---------------------------------------------------------------|-------------------------|
| <i>Capnocytophaga gingivalis</i> ATCC 33624 <sup>T</sup>      | <i>Flavobacteriia</i>   |
| <i>Capnocytophaga ochracea</i> F0287                          | <i>Flavobacteriia</i>   |
| <i>Capnocytophaga</i> sp. oral taxon 329 str. F0087           | <i>Flavobacteriia</i>   |
| <i>Capnocytophaga</i> sp. oral taxon 338 str. F0234           | <i>Flavobacteriia</i>   |
| <i>Capnocytophaga sputigena</i> ATCC 33612 <sup>T</sup>       | <i>Flavobacteriia</i>   |
| <i>Chryseobacterium gleum</i> F93, ATCC 35910 <sup>T</sup>    | <i>Flavobacteriia</i>   |
| <i>Dokdonia donghaensis</i> MED134                            | <i>Flavobacteriia</i>   |
| Flavobacteria MS024-2A                                        | <i>Flavobacteriia</i>   |
| Flavobacteria MS024-3C                                        | <i>Flavobacteriia</i>   |
| Flavobacteria sp. BAL38                                       | <i>Flavobacteriia</i>   |
| Flavobacteria sp. BBFL7                                       | <i>Flavobacteriia</i>   |
| <i>Flavobacteriales</i> sp. ALC-1                             | <i>Flavobacteriia</i>   |
| <i>Flavobacterium indicum</i> GPSTA100-9 <sup>T</sup>         | <i>Flavobacteriia</i>   |
| <i>Kordia algicida</i> OT-1 <sup>T</sup>                      | <i>Flavobacteriia</i>   |
| <i>Krokinobacter</i> sp. 4H-3-7-5                             | <i>Flavobacteriia</i>   |
| <i>Lacinutrix</i> sp. 5H-3-7-4                                | <i>Flavobacteriia</i>   |
| <i>Leeuwenhoekiella blandensis</i> MED217 <sup>T</sup>        | <i>Flavobacteriia</i>   |
| <i>Polaribacter irgensii</i> 23-P <sup>T</sup>                | <i>Flavobacteriia</i>   |
| <i>Polaribacter</i> sp. MED152                                | <i>Flavobacteriia</i>   |
| <i>Psychroflexus torquis</i> ATCC 700755 <sup>T</sup>         | <i>Flavobacteriia</i>   |
| <i>Ulvibacter</i> sp. SCB49                                   | <i>Flavobacteriia</i>   |
| <i>Algoriphagus</i> sp. PR1                                   | <i>Cytophagia</i>       |
| <i>Microscilla marina</i> ATCC 23134 <sup>T</sup>             | <i>Cytophagia</i>       |
| <i>Mucilaginibacter paludis</i> TPT56, DSM 18603 <sup>T</sup> | <i>Sphingobacteriia</i> |
| <i>Pedobacter</i> sp. BAL39                                   | <i>Sphingobacteriia</i> |
| <i>Sphingobacterium spiritivorum</i> ATCC 33300               | <i>Sphingobacteriia</i> |
| <i>Sphingobacterium spiritivorum</i> ATCC 33861 <sup>T</sup>  | <i>Sphingobacteriia</i> |

<sup>a</sup>Draft status as of September 2011. Strains within each Class are listed alphabetically. <sup>T</sup> indicates type strain.

**Table S4. Protein export and secretion systems predicted for members of the phylum *Bacteroidetes*<sup>a</sup>.**

| Strains                                                   | Sec <sup>b</sup> | Tat <sup>c</sup> | T1SS <sup>d</sup> | T2SS <sup>d</sup> | T3SS <sup>f</sup> | T4SS <sup>g</sup> | T5SS <sup>h</sup> | T6SS <sup>i</sup> | T7SS <sup>i</sup> | ENP <sup>k</sup> | CU <sup>l</sup> | PorSS <sup>m</sup> |
|-----------------------------------------------------------|------------------|------------------|-------------------|-------------------|-------------------|-------------------|-------------------|-------------------|-------------------|------------------|-----------------|--------------------|
|                                                           |                  |                  |                   |                   |                   |                   |                   |                   |                   |                  |                 |                    |
| <b><u>Class Flavobacteriia</u></b>                        |                  |                  |                   |                   |                   |                   |                   |                   |                   |                  |                 |                    |
| <i>Capnocytophaga canimorsus</i> Cc5                      | +                | +                | -                 | -                 | -                 | -                 | -                 | -                 | -                 | -                | -               | +                  |
| <i>Capnocytophaga ochracea</i> DSM 7271 <sup>T</sup>      | +                | +                | -                 | -                 | -                 | -                 | -                 | -                 | -                 | -                | -               | +                  |
| <i>Cellulophaga algicola</i> DSM 14237 <sup>T</sup>       | +                | +                | -                 | -                 | -                 | -                 | -                 | -                 | -                 | -                | -               | +                  |
| <i>Cellulophaga lytica</i> DSM 7489 <sup>T</sup>          | +                | +                | -                 | -                 | -                 | -                 | -                 | -                 | -                 | -                | -               | +                  |
| <i>Croceibacter atlanticus</i> HTCC2559 <sup>T</sup>      | +                | +                | -                 | -                 | -                 | -                 | -                 | -                 | -                 | -                | -               | +                  |
| Flavobacteriaceae bacterium 3519-10                       | +                | +                | -                 | -                 | -                 | -                 | +/-               | -                 | -                 | +                | -               | +                  |
| <i>Flavobacterium johnsoniae</i> ATCC 17061 <sup>T</sup>  | +                | +                | -                 | +                 | -                 | +/-               | -                 | -                 | -                 | +                | -               | +                  |
| <i>Flavobacterium psychrophilum</i> JIP02/86              | +                | +                | -                 | +                 | -                 | -                 | -                 | -                 | -                 | -                | -               | +                  |
| ' <i>Gramella forsetii</i> ' KT0803                       | +                | +                | -                 | -                 | -                 | +/-               | -                 | -                 | -                 | -                | -               | +                  |
| <i>Maribacter</i> sp. HTCC2170                            | +                | +                | -                 | -                 | -                 | -                 | -                 | -                 | -                 | -                | -               | +                  |
| <i>Riemerella anatipestifer</i> DSM 15868 <sup>T</sup>    | +                | +                | -                 | -                 | -                 | -                 | -                 | -                 | -                 | -                | -               | +                  |
| <i>Robiginitalea biformata</i> HTCC2501 <sup>T</sup>      | +                | +                | -                 | -                 | -                 | -                 | -                 | -                 | -                 | -                | -               | +                  |
| <i>Weeksella virosa</i> DSM 16922 <sup>T</sup>            | +                | +                | -                 | -                 | -                 | -                 | -                 | -                 | -                 | -                | -               | +                  |
| <i>Zunongwangia profunda</i> SM-A87 <sup>T</sup>          | +                | +                | -                 | -                 | -                 | +/-               | -                 | -                 | -                 | -                | -               | +                  |
| <b><u>Class Cytophagia</u></b>                            |                  |                  |                   |                   |                   |                   |                   |                   |                   |                  |                 |                    |
| <i>Cytophaga hutchinsonii</i> ATCC 33406 <sup>T</sup>     | +                | +                | -                 | +                 | -                 | -                 | -                 | -                 | -                 | -                | -               | +                  |
| <i>Dyadobacter fermentans</i> DSM 18053 <sup>T</sup>      | +                | +                | -                 | -                 | -                 | -                 | -                 | -                 | -                 | +/-              | -               | +                  |
| <i>Leadbetterella byssophila</i> DSM 17132 <sup>T</sup>   | +                | +                | -                 | -                 | -                 | +/-               | -                 | -                 | -                 | -                | -               | +                  |
| <i>Marivirga tractuosa</i> DSM 4126 <sup>T</sup>          | +                | +                | -                 | -                 | -                 | -                 | -                 | -                 | -                 | -                | -               | +                  |
| <i>Spirosoma linguale</i> DSM 74 <sup>T</sup>             | +                | +                | -                 | -                 | -                 | +/-               | -                 | -                 | -                 | +                | -               | +                  |
| <b><u>Class Sphingobacteriia</u></b>                      |                  |                  |                   |                   |                   |                   |                   |                   |                   |                  |                 |                    |
| <i>Chitinophaga pinensis</i> DSM 2588 <sup>T</sup>        | +                | +                | -                 | -                 | -                 | -                 | -                 | -                 | -                 | -                | -               | +                  |
| <i>Pedobacter heparinus</i> DSM 2366 <sup>T</sup>         | +                | +                | -                 | +                 | -                 | -                 | -                 | -                 | -                 | -                | -               | +                  |
| <i>Pedobacter saltans</i> DSM 12145 <sup>T</sup>          | +                | +                | -                 | -                 | -                 | +/-               | -                 | -                 | -                 | -                | -               | +                  |
| <b><u>Class Bacteroidia</u></b>                           |                  |                  |                   |                   |                   |                   |                   |                   |                   |                  |                 |                    |
| <i>Alistipes shahii</i> WAL 8301 <sup>T</sup>             | +/-              | +                | -                 | -                 | -                 | -                 | -                 | -                 | -                 | -                | -               | -                  |
| <i>Bacteroides fragilis</i> NCTC 9343 <sup>T</sup>        | +                | +                | +/-               | -                 | -                 | +/-               | -                 | -                 | -                 | -                | -               | -                  |
| <i>Bacteroides helcogenes</i> P 36-108 <sup>T</sup>       | +                | +                | +/-               | -                 | -                 | -                 | +/-               | -                 | -                 | -                | -               | -                  |
| <i>Bacteroides salanitronis</i> BL78 <sup>T</sup>         | +                | +                | +/-               | -                 | -                 | +/-               | -                 | -                 | -                 | -                | -               | -                  |
| <i>Bacteroides thetaiotaomicron</i> VPI-5482 <sup>T</sup> | +/-              | +                | +/-               | -                 | -                 | +/-               | -                 | -                 | -                 | -                | -               | -                  |
| <i>Bacteroides vulgatus</i> ATCC 8482 <sup>T</sup>        | +/-              | +/-              | +/-               | -                 | -                 | +/-               | -                 | -                 | -                 | -                | -               | -                  |

|                                                          |     |   |     |     |   |     |     |   |   |     |   |   |
|----------------------------------------------------------|-----|---|-----|-----|---|-----|-----|---|---|-----|---|---|
| <i>Bacteroides xylanisolvens</i> XB1A <sup>T</sup>       | +/- | - | -   | -   | - | +/- | -   | - | - | -   | - | - |
| <i>Odoribacter splanchnicus</i> DSM 20712 <sup>T</sup>   | +   | + | -   | +   | - | -   | -   | - | - | -   | - | - |
| <i>Paludibacter propionisigenes</i> WB4 <sup>T</sup>     | +   | + | -   | -   | - | -   | -   | - | - | -   | - | + |
| <i>Parabacteroides distasonis</i> ATCC 8503 <sup>T</sup> | +   | + | -   | -   | - | -   | -   | - | - | -   | - | + |
| <i>Porphyromonas gingivalis</i> ATCC 33277 <sup>T</sup>  | +   | - | -   | -   | - | +/- | -   | - | - | -   | - | + |
| <i>Prevotella melaninogenica</i> ATCC 25845 <sup>T</sup> | +   | - | -   | -   | - | +/- | -   | - | - | +/- | - | + |
| <i>Prevotella ruminicola</i> 23                          | +   | + | -   | -   | - | -   | +/- | - | - | -   | - | + |
| <b><i>Incertae sedis</i><sup>3</sup></b>                 |     |   |     |     |   |     |     |   |   |     |   |   |
| <i>Rhodothermus marinus</i> DSM 4252 <sup>T</sup>        | +   | + | +/- | +/- | + | -   | -   | - | - | -   | - | - |
| <i>Salinibacter ruber</i> DSM 13855 <sup>T</sup>         | +   | + | -   | +/- | + | -   | -   | - | - | -   | - | - |

<sup>a</sup>Secretion and export systems were identified by searching each genome with COGs, PFAMs, or TIGRFAMs corresponding to key components of each system as indicated below using the IMG v 3.5 Function Profile tool.

<sup>b</sup>The following COGs and TIGRFAMs (protein listed in parenthesis) were used to identify genes for key components of the *sec* system: COG0653, Tigr00963 (SecA); COG0690, Tigr00964 (SecE); COG1314, Tigr00810 (SecG); COG0201, Tigr00967 (SecY); COG0706, Tigr 03592 and Tigr03593 (YidC); COG1862, Tigr00739 (YajC). A '+' indicates that genes corresponding to each of these were identified in the genome. *A. shahii* was given a '+/-' because it lacked a homolog to SecY, and *B. thetaiotaomicron*, *B. vulgatus*, and *B. xylanisolvens* were given '+/-' because they lacked homologs to SecE.

<sup>c</sup>The following COGs and TIGRFAMs (protein listed in parenthesis) were used to identify genes for key components of the TAT system: COG0805, Tigr00945 (TatC); COG1826, Tigr01411 (TatA/E). '+' indicates that genes corresponding to *tatA* and *tatC* were identified in the genome, +/- indicates that a gene corresponding to only one was identified, and - indicates that genes corresponding to neither *tatA* nor *tatC* were identified.

<sup>d</sup>T1SSs were identified using the following: Tigr01843 (HlyD); Tigr01846 (HlyB); Tigr01844 (TolC). '-' indicates none of the genes were identified. '+/-' indicates that a gene related to *tolC* gene was identified.

<sup>e</sup>T2SSs were identified using the following COGs: COG1450 (PulD), COG2804 (PulE), COG1459 (PulF), COG2165 (PulG). A '+' indicates that genes corresponding to each of these were identified in the genome. '-' indicates none of the genes were identified. '+/-' indicates that genes corresponding to some of these were present. *R. marinus* and *S. ruber* had genes corresponding to PulD, PulE, and PulF, but these were adjacent to a *pilT* gene, and are thus likely to be associated with Type IV pili rather than Type II secretion.

<sup>f</sup>T3SSs were identified using the following COGs: COG1157 (FliI), COG1766 (FliF), COG1886 (FliN). '+' indicates that genes corresponding to each of these were identified in the genome. '-' indicates none of the genes were identified. Note that the potential T3SS genes of *R. marinus* and *S. ruber* were all clustered with flagellar motility and chemotaxis genes, and are thus likely components of the flagellar apparatus rather than free-standing T3SSs.

<sup>g</sup>T4SSs were identified using the following COGs: COG3838 (VirB2), COG3702 (VirB3), COG3451 (VirB4), COG3704 (VirB6), COG3736 (VirB8), COG3504 (VirB9), COG2948 (VirB10) COG0630 (VirB11), COG3505 (VirD4). '-' indicates none of the genes were identified. '+/-' indicates presence of apparent VirB4 and VirD4 genes, but absence of the other T4SS genes.

<sup>h</sup>T5SSs were identified using the following: COG3468 (adhesin Aida), COG5295 (autotransporter adhesin), COG5571 (autotransporter  $\beta$ -barrel domain), pfam03797 (autotransporter beta domain). '-' indicates that no matches were identified. '+/-' indicates that a match was found to pfam03797.

<sup>i</sup>T6SSs were identified using the following: Tigr03345, Tigr03347, Tigr03350, Tigr03352, Tigr03353, Tigr03354, Tigr03355, Tigr03358, Tigr03362, Tigr03373. '-' indicates that none of the T6SS genes were identified.

<sup>j</sup>T7SSs were identified using the following: Tigr03919, Tigr03920, Tigr03921, Tigr03922, Tigr03923, Tigr03924, Tigr03925, Tigr03926, Tigr03927, Tigr03928, Tigr03931. '-' indicates that none of the T7SS genes were identified.

<sup>k</sup>ENP pathways (T8SSs) were identified using the following: pfam03783 (CsgG), pfam07012 (Curlin associated repeat), pfam10614 (Tafi-CsgF), pfam10627 (CsgE). '+' indicates that genes corresponding to each of these were identified in the genome. '+/-' indicates that a gene corresponding to only CsgG was identified. '-' indicates that genes corresponding to none of the genes were identified.

<sup>l</sup>Chaperone-Usher secretion systems (CU) were identified using pfam00577 (Usher). A '-' indicates that a gene corresponding to the usher gene was not identified.

<sup>m</sup>PorSSs were identified by BLASTP analysis as indicated in Figure 2 and Table S2. A '+' indicates that each of the following core PorSS genes were identified: *gldK*, *gldL*, *gldM*, *gldN*, *sprA*, *sprE*, *sprT*. A '-' indicates that three or fewer of these genes were present.
